# Supplementary material for: Novel Finding of Coronary Ectasia in a Case of Acute Rheumatic Fever
Source: Case Rep Pediatr. 2013 Jul 9;2013:674174. doi: 10.1155/2013/674174 (PMC3722906; doi:10.1155/2013/674174)
Supplement: Supplementary file 1 — Video 1: The initial echocardiogram of the patient in this case shows a parasternal short axis view demonstrating flow through the dilated LMCA. Video 2: Subsequent echocardiogram shows a parasternal long axis view. This video demonstrates progression of aortic valve (AV) and mitral valve (MV) regurgitation from previous images. [file 674174.f1.zip]

Archive with 2 entries (2 files):
- video_1_cripe_546372.mov
- video_2_cripe_546373.mov
